# Supplementary material for: High neopterin and IP-10 levels in cerebrospinal fluid are associated with neurotoxic tryptophan metabolites in acute central nervous system infections
Source: Springer Nature journal article supplement (doi:10.1186/s12974-018-1366-3), 2018-11-23
Supplement: MOESM1 [file 16291226]

**Table S1 Case definitions**

| Condition                           | Case definition                                                                                                                                                                                                                                                                                                                                                                                                                                                                                                             |
|-------------------------------------|-----------------------------------------------------------------------------------------------------------------------------------------------------------------------------------------------------------------------------------------------------------------------------------------------------------------------------------------------------------------------------------------------------------------------------------------------------------------------------------------------------------------------------|
| Encephalitis <sup>a</sup>           | Encephalopathy (altered mental function or change in personality) for >24 hours<br>with no other cause identified and at least two of the following:<br><br>1. $\geq 5 \times 10^6$ /L leucocytes (WBC) in cerebrospinal fluid (CSF)<br><br>2. new onset of seizures,<br><br>3. new onset of focal neurology,<br><br>4. documented fever $>38^\circ\text{C}$ before or within 24 hours after hospitalisation,<br><br>5. EEG findings suggestive of encephalitis and/or<br><br>6. MRI/CT findings suggestive of encephalitis |
| Aseptic meningitis<br>(ASM)         | 1. Clinical signs of meningitis (headache, neck stiffness, photophobia and/or fever),<br><br>2. $\geq 5 \times 10^6$ /L leucocytes in CSF and<br><br>3. culture negative CSF                                                                                                                                                                                                                                                                                                                                                |
| Acute bacterial<br>meningitis (ABM) | 1. Clinical signs of meningitis (as criteria 1 for ASM),<br><br>2. $\geq 5 \times 10^6$ /L leucocytes in CSF and<br><br>3. detected bacteria in CSF, either by culture or PCR                                                                                                                                                                                                                                                                                                                                               |
| Viral meningitis (VM)               | 1. As aseptic meningitis, criteria 1 and 2 and<br><br>2. virus detected by PCR in CSF                                                                                                                                                                                                                                                                                                                                                                                                                                       |

<sup>a</sup>based on the Consortium Definition published in 2013 by Venkatesan et al; CID 2013:57
