# Supplementary material for: High neopterin and IP-10 levels in cerebrospinal fluid are associated with neurotoxic tryptophan metabolites in acute central nervous system infections
Source: Springer Nature journal article supplement (doi:10.1186/s12974-018-1366-3), 2018-11-23
Supplement: MOESM6 [file 16291226]

Fig. S2

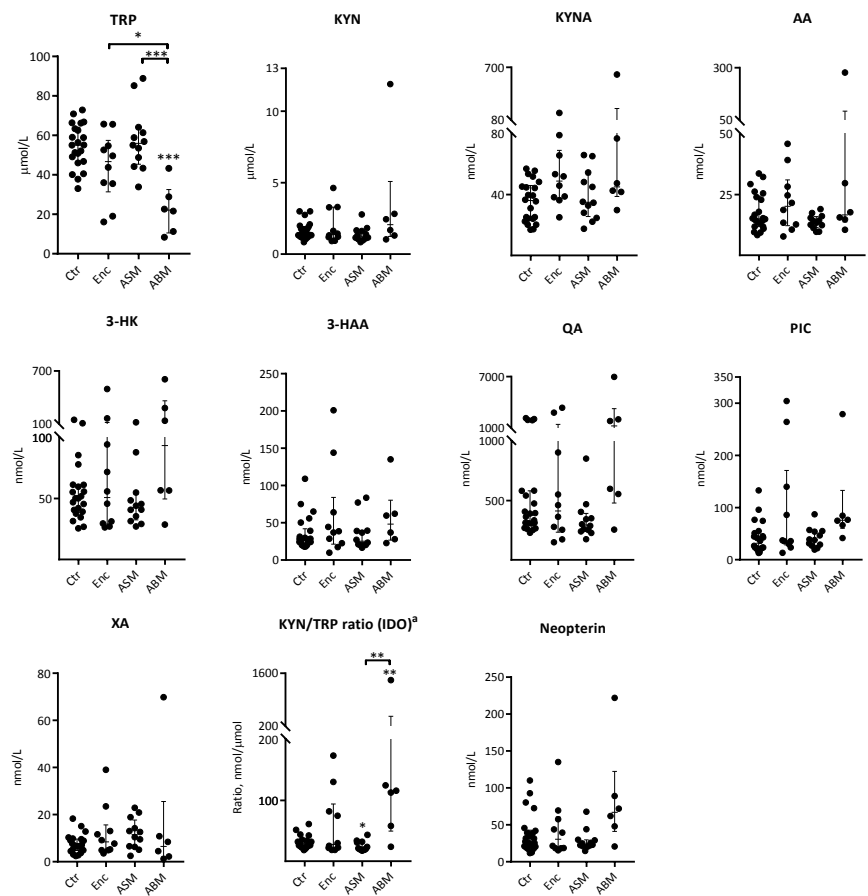

Kynurenine metabolites and enzymes in serum of patients with encephalitis (Enc, n=10), viral meningitis (VM, n=12) and bacterial meningitis (ABM, n=6) in comparison with controls (Ctr, n=22). Data shown are medians with IQR. If significant in analysis of variance with the Kruskal Wallis test, comparisons of two groups were analysed by Mann-Whitney U test.

Asterisks above patient groups indicate significant difference vs controls, asterisks above horizontal lines indicate significant differences between individual groups (Mann-Whitney U tests): \*p<0.05, \*\*p<0.01 and \*\*\*p<0.001.

<sup>a</sup> KYN/TRP ratio is calculated as KYN (nmol)/TRP( $\mu\text{mol}$ )
